# Supplementary material for: US-based cross-sectional survey of clinicians’ knowledge and attitudes about shared decision-making across healthcare professions and specialties
Source: PubMed Central journal article supplement — BMJ Open. 2018 Oct 18;8(10):e022730. doi: 10.1136/bmjopen-2018-022730 (PMC6196864; doi:10.1136/bmjopen-2018-022730), 2018-10-18
Supplement: bmjopen-2018-022730supp001.pdf [file bmjopen-2018-022730supp001.pdf]

Supplementary materials 1. Logistic regression results: True-false knowledge items

|                                       | Outcome variables                                                                            |                                                                               |                                                                                              |                                                                                                                                                                       |                                                                                                       |                                                                                               |                                                                        |                                                                                                         |                                                                                             |                                                                                     |
|---------------------------------------|----------------------------------------------------------------------------------------------|-------------------------------------------------------------------------------|----------------------------------------------------------------------------------------------|-----------------------------------------------------------------------------------------------------------------------------------------------------------------------|-------------------------------------------------------------------------------------------------------|-----------------------------------------------------------------------------------------------|------------------------------------------------------------------------|---------------------------------------------------------------------------------------------------------|---------------------------------------------------------------------------------------------|-------------------------------------------------------------------------------------|
|                                       | Shared decision-making interventions cause patients to feel uncertain about their decisions. | Using shared decision-making interventions increases patient decision regret. | Using shared decision-making interventions results in fewer patients choosing major surgery. | When communicating information about risks, it is best to use relative risk (e.g., there is double the risk of developing thrombosis when using oral contraceptives). | Most people will understand natural frequency (e.g., 1 in every 100 people) better than a percentage. | A majority of patients do not want to engage in shared decision-making with their clinicians. | Shared decision-making leads to improved affective-cognitive outcomes. | There is limited evidence of the impact of shared decision-making interventions on treatment adherence. | Shared decision-making interventions have a variable effect on the treatment option chosen. | Shared decision-making interventions have not been shown to affect health outcomes. |
| <b>Predictors: OR (95% CI)</b>        |                                                                                              |                                                                               |                                                                                              |                                                                                                                                                                       |                                                                                                       |                                                                                               |                                                                        |                                                                                                         |                                                                                             |                                                                                     |
| Paternalistic approach                | <b>0.088</b><br>( <b>0.018-0.438</b> )                                                       | 0.503<br>(0.080-3.169)                                                        | 1.046<br>(0.221-4.947)                                                                       | 0.665<br>(0.121-3.643)                                                                                                                                                | 0.491<br>(0.115-2.100)                                                                                | 0.951<br>(0.195-4.632)                                                                        | 0.216<br>(0.040-1.155)                                                 | 0.592<br>(0.107-3.290)                                                                                  | 1.194<br>(0.211-6.762)                                                                      | 3.691<br>(0.842-16.176)                                                             |
| Deliberative approach                 | <b>0.456</b><br>( <b>0.217-0.961</b> )                                                       | 1.055<br>(0.471-2.362)                                                        | 1.152<br>(0.652-2.036)                                                                       | <b>0.515</b><br>( <b>0.266-0.995</b> )                                                                                                                                | 0.902<br>(0.510-1.596)                                                                                | 1.379<br>(0.704-2.702)                                                                        | 1.414<br>(0.554-3.610)                                                 | 1.065<br>(0.592-1.915)                                                                                  | 1.482<br>(0.748-2.936)                                                                      | 0.947<br>(0.458-1.957)                                                              |
| Informative approach (reference)      | --                                                                                           | --                                                                            | --                                                                                           | --                                                                                                                                                                    | --                                                                                                    | --                                                                                            | --                                                                     | --                                                                                                      | --                                                                                          | --                                                                                  |
| Interpretive approach                 | 0.600<br>(0.148-2.439)                                                                       | 0.328<br>(0.098-1.095)                                                        | <b>3.700</b><br>( <b>1.269-10.787</b> )                                                      | 0.310<br>(0.066-1.458)                                                                                                                                                | <b>0.289</b><br>( <b>0.103-0.805</b> )                                                                | 0.676<br>(0.211-2.165)                                                                        | 1.110<br>(0.217-5.673)                                                 | 0.469<br>(0.124-1.776)                                                                                  | 1.399<br>(0.371-5.276)                                                                      | 2.678<br>(0.880-8.148)                                                              |
| Surgical NP (reference)               | --                                                                                           | --                                                                            | --                                                                                           | --                                                                                                                                                                    | --                                                                                                    | --                                                                                            | --                                                                     | --                                                                                                      | --                                                                                          | --                                                                                  |
| Family medicine NP                    | 2.345<br>(0.766-7.175)                                                                       | 1.257<br>(0.411-3.839)                                                        | <b>2.884</b><br>( <b>1.056-7.878</b> )                                                       | 1.449<br>(0.499-4.212)                                                                                                                                                | 0.631<br>(0.266-1.498)                                                                                | 1.691<br>(0.585-4.890)                                                                        | 1.492<br>(0.311-7.166)                                                 | 0.777<br>(0.304-1.986)                                                                                  | 0.690<br>(0.249-1.916)                                                                      | 0.789<br>(0.265-2.350)                                                              |
| Surgical PA                           | 1.722<br>(0.364-8.140)                                                                       | 1.342<br>(0.283-6.363)                                                        | 2.592<br>(0.660-10.173)                                                                      | --                                                                                                                                                                    | 0.818<br>(0.227-2.944)                                                                                | 0.860<br>(0.211-3.504)                                                                        | --                                                                     | 1.056<br>(0.293-3.802)                                                                                  | 1.225<br>(0.225-6.670)                                                                      | 0.839<br>(0.177-3.981)                                                              |
| Family medicine PA                    | <b>3.593</b><br>( <b>1.100-11.847</b> )                                                      | 2.978<br>(0.839-10.566)                                                       | 6.735<br>(2.482-18.274)                                                                      | <b>3.255</b><br>( <b>1.170-9.059</b> )                                                                                                                                | <b>0.388</b><br>( <b>0.163-0.923</b> )                                                                | 0.740<br>(0.426-3.580)                                                                        | 1.209<br>(0.267-5.469)                                                 | 0.783<br>(0.308-1.992)                                                                                  | 0.621<br>(0.218-1.763)                                                                      | 0.595<br>(0.192-1.845)                                                              |
| Surgeon                               | 1.601<br>(0.537-4.775)                                                                       | 2.475<br>(0.735-8.329)                                                        | 2.436<br>(0.817-7.265)                                                                       | 2.607<br>(0.825-8.235)                                                                                                                                                | 0.827<br>(0.312-2.194)                                                                                | 1.236<br>(0.426-3.580)                                                                        | <b>0.178</b><br>( <b>0.042-0.751</b> )                                 | 1.105<br>(0.424-2.876)                                                                                  | 0.704<br>(0.221-2.247)                                                                      | 0.994<br>(0.331-2.981)                                                              |
| Family medicine physician             | 2.658<br>(0.842-8.388)                                                                       | 2.327<br>(0.670-8.087)                                                        | 5.220<br>(1.845-14.767)                                                                      | 2.690<br>(0.886-8.172)                                                                                                                                                | 1.055<br>(0.400-2.781)                                                                                | 1.942<br>(0.653-5.774)                                                                        | 0.450<br>(0.104-1.944)                                                 | 0.667<br>(0.250-1.782)                                                                                  | 0.740<br>(0.237-2.311)                                                                      | 0.686<br>(0.222-2.121)                                                              |
| Prior SDM training                    | 2.693<br>(1.102-6.583)                                                                       | 1.812<br>(0.729-4.507)                                                        | 1.034<br>(0.539-1.984)                                                                       | 1.045<br>(0.493-2.217)                                                                                                                                                | 1.826<br>(0.943-3.536)                                                                                | <b>2.735</b><br>( <b>1.201-6.226</b> )                                                        | 1.338<br>(0.428-4.179)                                                 | 0.726<br>(0.368-1.430)                                                                                  | 0.659<br>(0.315-1.378)                                                                      | 0.669<br>(0.300-1.496)                                                              |
| No prior SDM training (reference)     | --                                                                                           | --                                                                            | --                                                                                           | --                                                                                                                                                                    | --                                                                                                    | --                                                                                            | --                                                                     | --                                                                                                      | --                                                                                          | --                                                                                  |
| Can't recall about prior SDM training | 3.227<br>(1.083-9.616)                                                                       | 1.689<br>(0.609-4.685)                                                        | 1.334<br>(0.662-2.689)                                                                       | 0.888<br>(0.396-2.000)                                                                                                                                                | 1.875<br>(0.910-3.861)                                                                                | 1.319<br>(0.595-2.928)                                                                        | 0.600<br>(0.211-1.701)                                                 | 0.695<br>(0.323-1.495)                                                                                  | 1.008<br>(0.427-2.379)                                                                      | 0.809<br>(0.331-1.980)                                                              |

|                              |                        |                        |                        |                         |                         |                                      |                        |                                      |                        |                         |
|------------------------------|------------------------|------------------------|------------------------|-------------------------|-------------------------|--------------------------------------|------------------------|--------------------------------------|------------------------|-------------------------|
| Male (reference)             | --                     | --                     | --                     | --                      | --                      | --                                   | --                     | --                                   | --                     | --                      |
| Female                       | 1.438<br>(0.644-3.210) | 2.776<br>(1.176-6.551) | 0.707<br>(0.381-1.312) | 1.244<br>(0.607-2.553)  | 0.962<br>(0.519-1.783)  | 1.331<br>(0.652-2.717)               | 0.625<br>(0.226-1.724) | <b>0.418</b><br><b>(0.218-0.803)</b> | 0.847<br>(0.401-1.791) | 0.605<br>(0.278-1.318)  |
| Prefers not to report gender | 0.122<br>(0.011-1.371) | 0.270<br>(0.033-2.222) | --                     | 1.015<br>(0.089-11.617) | 2.083<br>(0.166-26.105) | 0.399<br>(0.050-3.216)               | 0.689<br>(0.059-8.066) | 1.535<br>(0.191-12.325)              | 0.183<br>(0.022-1.521) | 2.730<br>(0.335-22.235) |
| Years in practice            | 1.010<br>(0.979-1.052) | 1.027<br>(0.981-1.074) | 1.000<br>(0.970-1.032) | 0.997<br>(0.962-1.033)  | 1.012<br>(0.980-1.044)  | <b>0.960</b><br><b>(0.928-0.994)</b> | 1.035<br>(0.983-1.089) | 0.999<br>(0.967-1.031)               | 0.992<br>(0.956-1.028) | 1.015<br>(0.978-1.053)  |

**bold type: p<0.05**

Supplementary materials 2. Logistic regression results: Attitude items

|                                  | Outcome variables                                                                                                                                   |                                                   |                                                                          |                                                                            |                                                                                         |                                                                                   |                                                                                                                |                                                                             |                                                                                    |                                                                       |
|----------------------------------|-----------------------------------------------------------------------------------------------------------------------------------------------------|---------------------------------------------------|--------------------------------------------------------------------------|----------------------------------------------------------------------------|-----------------------------------------------------------------------------------------|-----------------------------------------------------------------------------------|----------------------------------------------------------------------------------------------------------------|-----------------------------------------------------------------------------|------------------------------------------------------------------------------------|-----------------------------------------------------------------------|
|                                  | Shared decision-making can only be done with patients who are sufficiently educated to discuss treatment or screening options with their clinician. | Doing shared decision-making takes too much time. | Using shared decision-making with patients could increase my legal risk. | I try to imagine myself in my patients' shoes when providing care to them. | Giving patients informational resources is sufficient to foster shared decision-making. | Shared decision-making is challenging because patients ask me to decide for them. | It's okay for a shared decision to stray from what I feel is the most clinically appropriate course of action. | Shared decision-making is not compatible with clinical practice guidelines. | Doing shared decision-making may cause patients to question my clinical expertise. | I am not confident in my ability to engage in shared decision-making. |
| <b>Predictors: OR (95% CI)</b>   |                                                                                                                                                     |                                                   |                                                                          |                                                                            |                                                                                         |                                                                                   |                                                                                                                |                                                                             |                                                                                    |                                                                       |
| Paternalistic approach           | 0.137<br>(0.016-1.154)                                                                                                                              | 0.342<br>(0.076-1.544)                            | <b>0.155</b><br><b>(0.033-0.735)</b>                                     | --                                                                         | <b>0.082</b><br><b>(0.010-0.707)</b>                                                    | 0.209<br>(0.040-1.082)                                                            | 2.691<br>(0.488-14.839)                                                                                        | <b>0.130</b><br><b>(0.272-0.623)</b>                                        | <b>0.106</b><br><b>(0.023-0.485)</b>                                               | 0.306<br>(0.071-1.321)                                                |
| Deliberative approach            | 1.037<br>(0.616-1.745)                                                                                                                              | 1.587<br>(0.836-3.014)                            | 0.545<br>(0.297-1.000)                                                   | 0.968<br>(0.207-4.527)                                                     | 0.965<br>(0.567-1.643)                                                                  | <b>0.437</b><br><b>(0.256-0.745)</b>                                              | 0.932<br>(0.547-1.589)                                                                                         | <b>0.323</b><br><b>(0.148-0.704)</b>                                        | 0.773<br>(0.413-1.447)                                                             | 1.500<br>(0.714-3.151)                                                |
| Informative approach (reference) | --                                                                                                                                                  | --                                                | --                                                                       | --                                                                         | --                                                                                      | --                                                                                | --                                                                                                             | --                                                                          | --                                                                                 | --                                                                    |
| Interpretive approach            | 0.937<br>(0.346-2.541)                                                                                                                              | 1.322<br>(0.399-4.380)                            | 0.538<br>(0.175-1.657)                                                   | --                                                                         | 0.456<br>(0.164-1.272)                                                                  | 0.511<br>(0.186-1.406)                                                            | 1.259<br>(0.431-3.676)                                                                                         | 0.296<br>(0.079-1.108)                                                      | 0.649<br>(0.210-2.002)                                                             | 0.614<br>(0.194-1.944)                                                |
| Surgical NP                      | --                                                                                                                                                  | --                                                | --                                                                       | --                                                                         | --                                                                                      | --                                                                                | --                                                                                                             | --                                                                          | --                                                                                 | 2.069<br>(0.684-6.257)                                                |
| Family medicine NP               | 0.720<br>(0.329-1.576)                                                                                                                              | 1.416<br>(0.503-3.992)                            | 0.971<br>(0.341-2.759)                                                   | 0.760<br>(0.041-14.078)                                                    | 0.840<br>(0.374-1.887)                                                                  | 1.645<br>(0.738-3.671)                                                            | 1.083<br>(0.493-2.380)                                                                                         | 1.772<br>(0.385-8.150)                                                      | 0.872<br>(0.333-2.285)                                                             | <b>5.384</b><br><b>(1.309-22.137)</b>                                 |
| Surgical PA                      | 1.069<br>(0.328-3.490)                                                                                                                              | 1.283<br>(0.295-5.577)                            | 0.581<br>(0.145-2.325)                                                   | 0.195<br>(0.009-4.170)                                                     | 0.441<br>(0.132-1.475)                                                                  | 0.668<br>(0.201-2.214)                                                            | 0.794<br>(0.249-2.536)                                                                                         | 0.833<br>(0.131-5.305)                                                      | 0.895<br>(0.224-3.582)                                                             | 1.192<br>(0.309-4.607)                                                |
| Family medicine PA               | 0.614<br>(0.272-1.383)                                                                                                                              | 0.731<br>(0.280-1.907)                            | <b>0.377</b><br><b>(0.145-0.981)</b>                                     | 0.571<br>(0.045-7.185)                                                     | 1.004<br>(0.435-2.320)                                                                  | 1.318<br>(0.581-2.991)                                                            | 0.708<br>(0.316-1.583)                                                                                         | 0.399<br>(0.123-1.290)                                                      | 0.814<br>(0.306-2.163)                                                             | 1.876<br>(0.669-5.258)                                                |
| Surgeon                          | 0.783<br>(0.323-1.899)                                                                                                                              | 0.704<br>(0.244-2.033)                            | 0.527<br>(0.189-1.468)                                                   | 0.750<br>(0.055-10.240)                                                    | 0.963<br>(0.389-2.386)                                                                  | 1.313<br>(0.535-3.222)                                                            | 1.937<br>(0.774-4.849)                                                                                         | 0.397<br>(0.112-1.398)                                                      | 0.764<br>(0.266-2.195)                                                             | 1.161<br>(0.453-2.971)                                                |
| Family medicine physician        | 1.091<br>(0.460-2.586)                                                                                                                              | 0.393<br>(0.146-1.056)                            | 1.102<br>(0.385-3.153)                                                   | 1.457<br>(0.073-28.948)                                                    | 0.758<br>(0.315-1.827)                                                                  | 0.843<br>(0.352-2.020)                                                            | 1.827<br>(0.750-4.455)                                                                                         | 0.723<br>(0.201-2.605)                                                      | 0.926<br>(0.325-2.642)                                                             | --                                                                    |
| Prior SDM training               | 0.992<br>(0.547-1.797)                                                                                                                              | 1.131<br>(0.552-2.318)                            | 1.839<br>(0.902-3.751)                                                   | --                                                                         | 0.815<br>(0.443-1.499)                                                                  | 1.441<br>(0.787-2.639)                                                            | 0.975<br>(0.528-1.800)                                                                                         | <b>3.748</b><br><b>(1.305-10.766)</b>                                       | 0.796<br>(0.399-2.072)                                                             | 1.186<br>(0.527-2.667)                                                |

|                                       |                        |                        |                                      |                         |                         |                        |                        |                         |                         |                         |
|---------------------------------------|------------------------|------------------------|--------------------------------------|-------------------------|-------------------------|------------------------|------------------------|-------------------------|-------------------------|-------------------------|
| No prior SDM training (reference)     | --                     | --                     | --                                   | --                      | --                      | --                     | --                     | --                      | --                      | --                      |
| Can't recall about prior SDM training | 0.710<br>(0.368-1.373) | 1.239<br>(0.566-2.713) | 1.158<br>(0.545-2.460)               | 3.154<br>(0.347-28.630) | 0.654<br>(0.337-1.270)  | 1.356<br>(0.695-2.646) | 0.759<br>(0.393-1.467) | 1.560<br>(0.620-3.922)  | 1.155<br>(0.517-2.583)  | 1.022<br>(0.425-2.458)  |
| Male (reference)                      | --                     | --                     | --                                   | --                      | --                      | --                     | --                     | --                      | --                      | --                      |
| Female                                | 1.248<br>(0.700-2.227) | 1.075<br>(0.549-2.104) | <b>2.016</b><br><b>(1.046-3.886)</b> | 2.664<br>(0.476-14.913) | 1.724<br>(0.957-3.106)  | 1.010<br>(0.560-1.810) | 1.243<br>(0.687-2.247) | 1.269<br>(0.574-2.803)  | 1.050<br>(0.542-2.072)  | 1.350<br>(0.637-2.860)  |
| Prefers not to report gender          | 0.493<br>(0.044-5.458) | --                     | 3.587<br>(0.252-50.970)              | 0.120<br>(0.007-2.016)  | 1.433<br>(0.152-13.495) | 0.378<br>(0.034-4.144) | 0.588<br>(0.072-4.822) | 1.471<br>(0.104-20.850) | 1.713<br>(0.118-24.802) | 1.280<br>(0.111-14.745) |
| Years in practice                     | 0.987<br>(0.959-1.016) | 1.032<br>(0.995-1.069) | 0.978<br>(0.947-1.010)               | 0.989<br>(0.908-1.077)  | 1.010<br>(0.981-1.040)  | 1.01<br>(0.980-1.040)  | 1.015<br>(0.985-1.046) | 1.014<br>(0.973-1.057)  | 1.013<br>(0.978-1.048)  | 1.020<br>(0.981-1.061)  |

**bold type: p<0.05**
