# Supplementary material for: US-based cross-sectional survey of clinicians’ knowledge and attitudes about shared decision-making across healthcare professions and specialties
Source: PubMed Central journal article supplement — BMJ Open. 2018 Oct 18;8(10):e022730. doi: 10.1136/bmjopen-2018-022730 (PMC6196864; doi:10.1136/bmjopen-2018-022730), 2018-10-18
Supplement: bmjopen-2018-022730supp003.pdf [file bmjopen-2018-022730supp003.pdf]

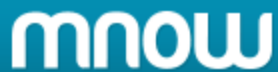

**Invitation to online study - Communication in Healthcare Study - 125517**

Dear [REDACTED]

You are invited to participate in our online study regarding Communication in Healthcare.

---

Length of Study: **5 minutes**

Honorarium: **USD 5**

End date: **November 18 2017**

*(or when we have received the number of responses we need, whichever comes first)*

**BEGIN STUDY >**

---

You will first be asked a short set of questions to find out if you qualify. If so, you may continue with the remainder of the study.

If you require any further assistance, please reply to [support@mnow.com](mailto:support@mnow.com) and include the study name, number, description of the problem and this reference code: 125517-1891117790.

Sincerely,  
The MNOW Team
